# Supplementary material for: Efficacy and safety of lapatinib and trastuzumab for HER2-positive breast cancer: a systematic review and meta-analysis of randomised controlled trials
Source: PubMed Central journal article supplement — BMJ Open. 2017 Mar 10;7(3):e013053. doi: 10.1136/bmjopen-2016-013053 (PMC5353336; doi:10.1136/bmjopen-2016-013053), 2017-03-10
Supplement: bmjopen-2016-013053supp_appendix.pdf [file bmjopen-2016-013053supp_appendix.pdf]

**Appendix 1: search strategy**

| Database        | Period of search       | Search strategy                                                                                                                                                                                                                                                                                                                                                                                                                                                                                                                                                     |
|-----------------|------------------------|---------------------------------------------------------------------------------------------------------------------------------------------------------------------------------------------------------------------------------------------------------------------------------------------------------------------------------------------------------------------------------------------------------------------------------------------------------------------------------------------------------------------------------------------------------------------|
| PubMed          | 1987 to March 11, 2016 | ("breast neoplasms"[MeSH Terms] OR ("breast"[All Fields] AND "neoplasms"[All Fields]) OR "breast neoplasms"[All Fields] OR ("breast"[All Fields] AND "cancer"[All Fields]) OR "breast cancer"[All Fields]) AND ("lapatinib"[Supplementary Concept] OR "lapatinib"[All Fields]) AND ("trastuzumab"[MeSH Terms] OR "trastuzumab"[All Fields])                                                                                                                                                                                                                         |
| Embase (OvidSP) | 1987 to March 11, 2016 | <p>1 (breast neoplasms* or or breast cancer* or breast tumors*, breast carcinoma*, tumors breast*, mammary cancer*, mammary carcinoma*).af.</p> <p>2 exp breast neoplasms / or exp breast neoplasms/ or exp breast carcinoma/ or exp mammary cancer/ or exp mammary carcinoma</p> <p>3 1 or 2</p> <p>4 (lapatinib * or lapatinib ditosylate* or GW 282974X* or GW-282974X* or GW572016* or GW-572016).af.</p> <p>5 exp lapatinib / or exp lapatinib ditosylate / or exp GW 282974X or exp GW572016</p> <p>6 4 or 5</p> <p>7 3 and 6</p> <p>8 (trastuzumab*).af.</p> |

|                |                        |                                                                                                                                                                                                                                                                                                                               |
|----------------|------------------------|-------------------------------------------------------------------------------------------------------------------------------------------------------------------------------------------------------------------------------------------------------------------------------------------------------------------------------|
|                |                        | <p>9 exp trastuzumab /</p> <p>10 8 or 9</p> <p>11 7 and 10</p>                                                                                                                                                                                                                                                                |
| Web of Science | 1987 to March 11, 2016 | <p>#1 TS= (breast neoplasms* OR breast cancer* OR breast tumors*, OR breast carcinoma*, OR tumors breast*, OR mammary cancer*, OR mammary carcinoma*)</p> <p>#2 TS= (lapatinib * OR lapatinib ditosylate* OR GW 282974X* or GW-282974X* OR GW572016* OR GW-572016)</p> <p>#3 TS=(trastuzumab*)</p> <p>#4 #3 AND #2 AND #1</p> |
